# Supplementary material
Source: publisher site journal article supplement (https://www.dovepress.com/get_supplementary_file.php?f=389963.docx)
Supplement: Supplementary file 1 [file get_supplementary_file.php]

**Supplementary materials**

**STable 1** Medical reasons for exclusion

| General conditions | Ophthalmological conditions |
| --- | --- |
| Endocrinological conditions (mainly thyroid diseases) | Dry eye disease |
| Gastrointestitional diseases | Corneal scars (usually after foreign body) |
| Hypertension | Meibomian gland dysfunction |
| Diabetes mellitus | Corneal dystrophy |
| Mental health disease | Heterochromia |
| Previous neoplasm | Uveitis |
| Previous GvHD | Peripheral degeneration of the eye globe (including lattice degeneration) |
|  | Drusen of the optic nerve |

**STable 2** Summary of the basic optic nerve head parameters and its differences between groups

|  | RNFL [µm] | Disc area [mm2] | Cup volume [mm3] | C/D | DDLS |
| --- | --- | --- | --- | --- | --- |
| All (n=371) | 102.09 ± 9.27 | 2.12 ± 0.41 | 0.13 ± 0.14 | 0.29 ± 0.15 | 3.02 ± 0.02 |
| Emmetropic group (n=93) | 104.52 ± 9.22 | 2.08 ± 0.39 | 0.12 ± 0.09 | 0.28 ± 0.13 | 3.01 ± 0.02 |
| Hyperopic group (n=102) | 103.89 ± 8.97 | 2.02 ± 0.37 | 0.13 ± 0.03 | 0.25 ± 0.19 | 2.98 ± 0.07 |
| Myopic group (n=138) | 99.68 ± 9.76 | 2.14 ± 0.43 | 0.14 ± 0.05 | 0.41 ± 0.14 | 3.08 ± 0.01 |
| Progressive myopia group (n=48) | 97.72 ± 9.21 | 2.11 ± 0.40 | 0.13 ± 0.01 | 0.40 ± 0.15 | 3.04 ± 0.03 |
|  | p=0.3449 | p=0.8371 | p=0.9107 | p=0.3077 | p=0.2677 |

**Notes:** Variables represented as mean ± standard deviation.

**Abbreviations:** RNFL, Retinal nerve fiber layer; C/D, cup to disc ratio; DDLS, Disc damage likelihood scale; n, number of subjects; µm, micrometre; mm, millimeter.

**STable 3** The changes in the linear correlation (the r parameter) between RNFL thickness and vascular parameters in macular region

|  | Average RNFL | Superior RNFL | Inferior RNFL |
| --- | --- | --- | --- |
|  | All study participants (N= 371) | | |
| FAZ (mm2) | -0.47* | -0.42* | -0.31* |
| Perimeter (mm) | -0.48* | -0.42* | -0.33* |
| FD | 0.26 | 0.16 | 0.36* |
|  | Myopia group (N= 138) | | |
| FAZ (mm2) | -0.63* | -0.51* | -0.41* |
| Perimeter (mm) | -0.84* | -0.63* | -0.52* |
| FD | 0.27 | 0.15 | 0.36* |
|  | Progressive myopia subgroup (N= 48) | | |
| FAZ (mm2) | -0.51* | -0.43* | -0.38* |
| Perimeter (mm) | -0.53* | -0.48* | -0.42* |
| FD | 0.25 | 0.15 | 0.34* |

**Abbreviations:** RNFL, Retinal nerve fiber layer; FAZ, foveal avascular zone; FD, foveal vascular density; n, number of subjects; µm, micrometre; mm, millimeter; * indicates the significant correlations, p<0.05.
